# Supplementary material for: Overexpression of NtGPX8a Improved Cadmium Accumulation and Tolerance in Tobacco (Nicotiana tabacum L.)
Source: MDPI journal article supplement (doi:10.3390/genes15030366), 2024-03-15
Supplement: s1 [file s1]

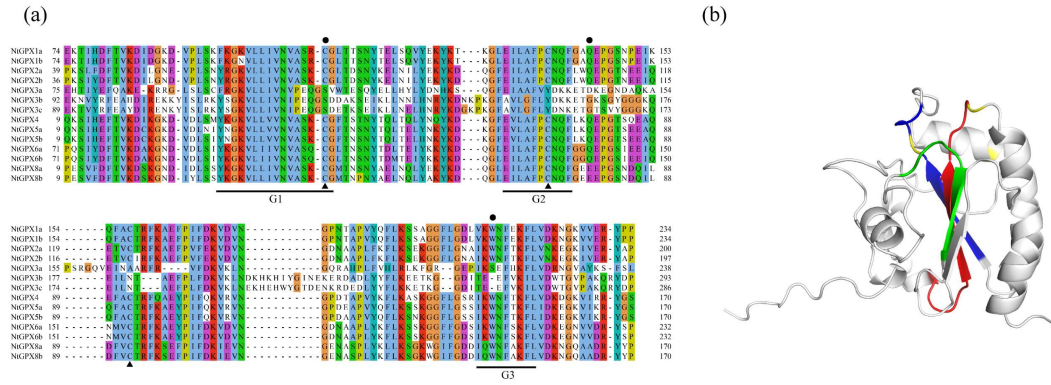

Figure S1. Multiple sequence alignment of the *NtGPX* gene family and 3D model of NtGPX8a. (a) The triangles denote three conserved Cys residues, while the circles represent the three amino acids Cys, Trp, and Gln that constitute the catalytic triad. G1, G2, and G3 indicate highly conserved characteristic domains. (b) 3D model of NtGPX8a. Red represents the G1 domain, blue represents the G2 domain, and green represents the G3 domain, Yellow represents critical Cys residues in NtGPX8a.

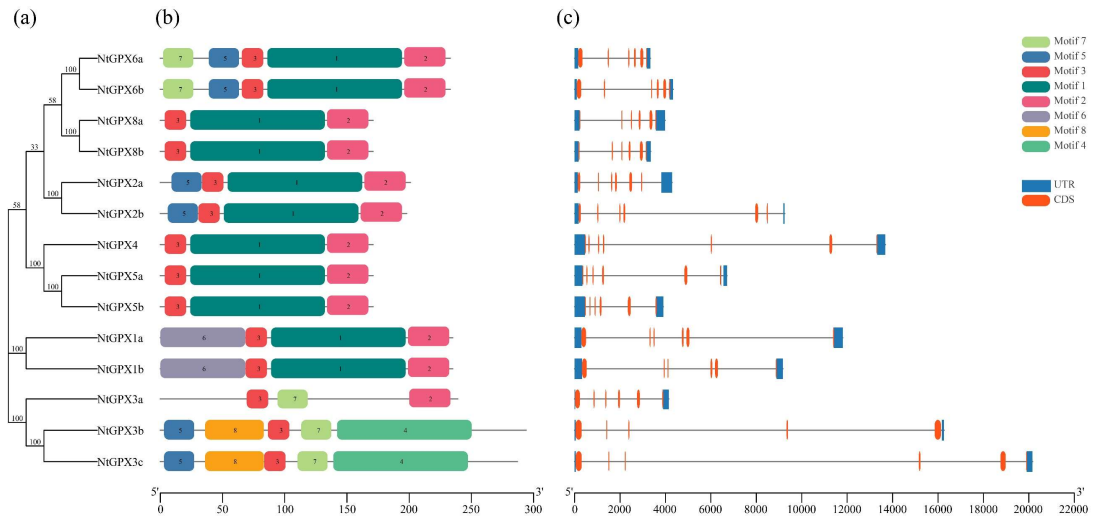

Figure S2. *NtGPX* family genes system evolutionary tree, conserved domains, and exon-intron structure: (a) Evolutionary tree of the *NtGPX* family system constructed using the neighbor-joining method; (b) Conserved domains of NtGPX proteins; (c) Gene structure of the *NtGPX* family, with introns represented by black lines, and UTR and CDS indicated by different colored boxes.

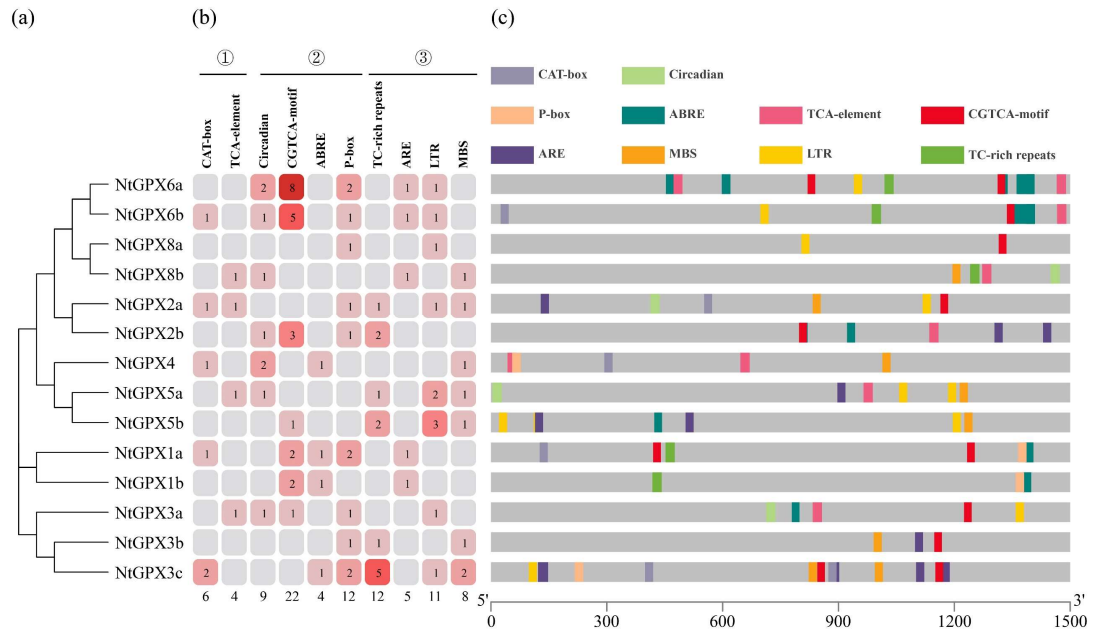

Figure S3. *NtGPX* family genes promoter *cis*-acting element analysis. The frequency of occurrence of *cis*-acting elements is represented by numbers and different colored boxes.

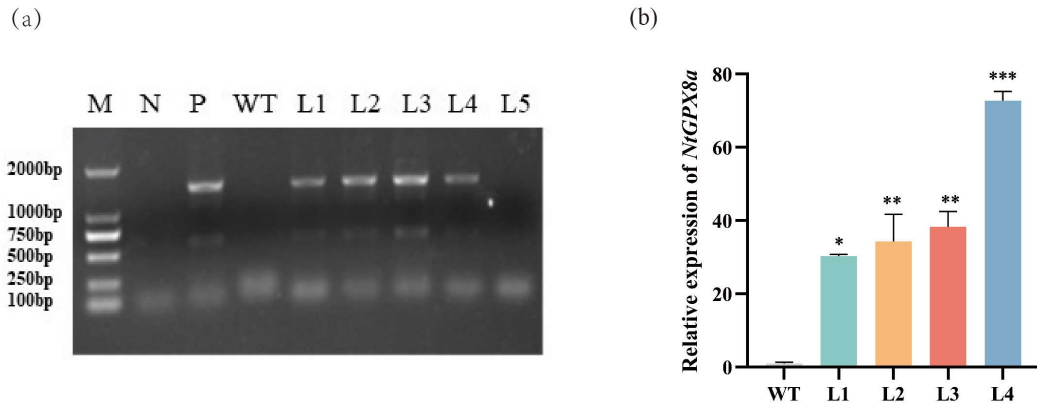

Figure S4. Identification of tobacco positive plants overexpressing *NtGPX8a*. (a) Identification of transgenic tobacco lines overexpressing *NtGPX8a*. (a) Genomic PCR electrophoresis of transgenic tobacco. M: 2000-bp DNA marker; N: negative control with sterile water as the PCR template; P: positive control with pCXS::*NtGPX8a* plasmid as the template; the positive control lanes show two bands at 1460-bp and 606-bp, respectively. (b) Relative expression levels of *NtGPX8a* in different strains of tobacco (stars in the figure indicate statistically significant differences calculated using One-way ANOVA, \* represents  $p < 0.05$ , \*\* represents  $p < 0.01$ , \*\*\* represents  $p < 0.001$ ,  $n = 3$ ).

**Supplementary Table S1. Putative *NtGPX* family overall features in tobacco**

| Gene name | Gene ID    | mRNA ID     | CDS       | Amino acid | MW(kDa) | pI   | Subcellular                 |
|-----------|------------|-------------|-----------|------------|---------|------|-----------------------------|
|           |            |             | size (bp) | size (aa)  |         |      | localization prediction     |
| NtGPX1a   | gene_46900 | mRNA_100233 | 708       | 235        | 25.79   | 9.36 | Chloroplast. Mitochondrion. |
| NtGPX1b   | gene_83324 | mRNA_178811 | 708       | 235        | 25.73   | 9.39 | Chloroplast. Mitochondrion. |
| NtGPX2a   | gene_33363 | mRNA_71469  | 606       | 201        | 22.83   | 7.63 | Chloroplast. Mitochondrion. |
| NtGPX2b   | gene_45308 | mRNA_96996  | 597       | 198        | 22.45   | 6.37 | Chloroplast. Mitochondrion. |
| NtGPX3a   | gene_32960 | mRNA_70560  | 720       | 239        | 27.03   | 8.94 | Nucleus.                    |
| NtGPX3b   | gene_46901 | mRNA_100234 | 885       | 294        | 33.17   | 9.36 | Mitochondrion.              |
| NtGPX3c   | gene_83263 | mRNA_178677 | 864       | 287        | 32.36   | 9.04 | Mitochondrion.              |
| NtGPX4    | gene_52083 | mRNA_111240 | 516       | 171        | 19.10   | 9.5  | Chloroplast. Nucleus.       |
| NtGPX5a   | gene_4916  | mRNA_10500  | 516       | 171        | 18.96   | 8.79 | Chloroplast. Nucleus.       |
| NtGPX5b   | gene_12872 | mRNA_27583  | 516       | 171        | 18.89   | 9.08 | Chloroplast.                |
| NtGPX6a   | gene_62683 | mRNA_133920 | 702       | 233        | 26.00   | 8.96 | Chloroplast.                |
| NtGPX6b   | gene_66346 | mRNA_141800 | 702       | 233        | 25.97   | 9.01 | Mitochondrion.              |
| NtGPX8a   | gene_14893 | mRNA_31782  | 516       | 171        | 19.27   | 4.91 | Cytoplasm.Chloroplast.      |
| NtGPX8b   | gene_84095 | mRNA_180432 | 516       | 171        | 19.29   | 4.98 | Cytoplasm.Chloroplast.      |

**Supplementary Table S2. *Cis*-acting elements of *NtGPX* genes promoter regions**

| Element         | Core sequence | Function annotation                                                         | No. of genes<br>containing element |
|-----------------|---------------|-----------------------------------------------------------------------------|------------------------------------|
| TCA-element     | TCAGAAGAGG    | <i>cis</i> -acting element involved in salicylic acid responsiveness        | 9                                  |
| ABRE            | ACGTG         | <i>cis</i> -acting element involved in the abscisic acid responsiveness     | 22                                 |
| P-box           | CCTTTTG       | gibberellin-responsive element                                              | 4                                  |
| CGTCA-motif     | CGTCA         | <i>cis</i> -acting regulatory element involved in the MeJA-responsiveness   | 12                                 |
| ARE             | AAACCA        | <i>cis</i> -acting regulatory element essential for the anaerobic induction | 12                                 |
| TC-rich repeats | GTTTTCTTAC    | <i>cis</i> -acting element involved in defense and stress responsiveness    | 5                                  |
| LTR             | CCGAAA        | <i>cis</i> -acting element involved in low-temperature responsiveness       | 11                                 |
| MBS             | CAACTG        | MYB binding site involved in drought-inducibility                           | 8                                  |
| CAT-box         | GCCACT        | <i>cis</i> -acting regulatory element related to meristem expression        | 6                                  |
| Circadian       | CAAAGATATC    | <i>cis</i> -acting regulatory element involved in circadian control         | 4                                  |

**Supplementary Table S3. qPCR primers**

| gene id        | name              | prime (5' - 3')          |
|----------------|-------------------|--------------------------|
| NtEF1 $\alpha$ | qF-NtEF1 $\alpha$ | TGAGATGCACCACGAAGCTC     |
|                | qR-NtEF1 $\alpha$ | CCAACATTGTCACCAGGAAGTG   |
| NtGPX1a        | qF-NtGPX1a        | GTCAATGTTGCTTCCAGATG     |
|                | qR-NtGPX1a        | GATTAGATCCTGGCTCTTGAG    |
| NtGPX1b        | qF-NtGPX1b        | AGGACTTGAGATTCTTGCTT     |
|                | qR-NtGPX1b        | GTGCTGTGTTAGGACCAT       |
| NtGPX2a        | qF-NtGPX2a        | CTTGTTCTTGCCTTGTCTT      |
|                | qR-NtGPX2a        | CCAGTATATCCTTGACAGTGA    |
| NtGPX2b        | qF-NtGPX2b        | CTTGTTCTTGCCTTGTCTT      |
|                | qR-NtGPX2b        | CCCAATATATCCTTGACAGTG    |
| NtGPX3a        | qF-NtGPX3a        | GGACAGAATCGCAGTATGA      |
|                | qR-NtGPX3a        | CTAGCAGCATTAACTCTCTACC   |
| NtGPX3b        | qF-NtGPX3b        | CTGAGCAAGGTTCTGATGA      |
|                | qR-NtGPX3b        | CCTGATTTGCCTGTTTCTTT     |
| NtGPX3c        | qF-NtGPX3c        | CAGGCACATCAGTATATGGA     |
|                | qR-NtGPX3c        | TCCTCTGTAATATCTCCTCCT    |
| NtGPX4         | qF-NtGPX4         | AGGTTCCAGGATTAAGTGGAAT   |
|                | qR-NtGPX4         | ATCGTAAGTTTCATAGACTGCAC  |
| NtGPX5a        | qF-NtGPX5a        | TCGTCAATGTTGCTTCCA       |
|                | qR-NtGPX5a        | TACCAGGCTCTTGCTTCA       |
| NtGPX5b        | qF-NtGPX5b        | TGACTGAACTCCACAACAA      |
|                | qR-NtGPX5b        | ACCATTAACTCGCACCTT       |
| NtGPX6a        | qF-NtGPX6a        | CCAGCAAGCCTCAATCTAT      |
|                | qR-NtGPX6a        | GTATATCTCGGTCAAGTCAGT    |
| NtGPX6b        | qF-NtGPX6b        | ACTCCTCCGATTCCAACA       |
|                | qR-NtGPX6b        | TTAGCATCCTTGACAGTGAA     |
| NtGPX8a        | qF-NtGPX8a        | TCAGAGGAGAGGTGGTAGGAT    |
|                | qR-NtGPX8a        | AGGGAGCAATGATCAGATCTTAGA |
| NtGPX8b        | qF-NtGPX8b        | TACGCAGAACTCAACCAAT      |
|                | qR-NtGPX8b        | CACCATTCACTTCAATCTTG     |

**Supplementary Table S4. Construction of a prokaryotic expression vector and primer design for cross-vector detection.**

| name                       | prime (5' - 3')             |
|----------------------------|-----------------------------|
| sF-T7 promoter             | TAATACGACTCACTATAGGG        |
| sR-pET28a                  | AGTTATTGCTCAGCGGTGGCA       |
| F-NtGPX4- <i>Bam</i> H I   | cgGGATCCATGGGTGCTTCTAAATC   |
| R-NtGPX4- <i>Hind</i> III  | ccAAGCTTTCAATTCTCGCTTATTGCC |
| F-NtGPX5a- <i>Bam</i> H I  | cgGGATCCATGGGTGCCTCTTCAT    |
| R-NtGPX5a- <i>Hind</i> III | ccAAGCTTTCACACTTCCCCTAG     |
| F-NtGPX6a- <i>Bam</i> H I  | cgGGATCCATGCTTTGTTCTGTAAC   |
| R-GPX6a- <i>Hind</i> III   | ccAAGCTTTTAAGCAACACCCA      |
| F-NtGPX8a- <i>Bam</i> H I  | ccAAGCTTCACGATTTCCAGCAGC    |
| R-NtGPX8a- <i>Hind</i> III | cgGGATCCATGGCCAGCCAATCAGAGA |
